# Supplementary material for: Vapour-phase-transport rearrangement technique for the synthesis of new zeolites
Source: PubMed Central journal article supplement (PMC6851152; doi:10.1038/s41467-019-12882-3), 2019-11-12
Supplement: 41467_2019_12882_MOESM1_ESM.pdf [file 41467_2019_12882_MOESM1_ESM.pdf]

## **Supplementary Information**

### **Vapour-phase-transport rearrangement technique for the synthesis of new zeolites**

Kasneryk et al.

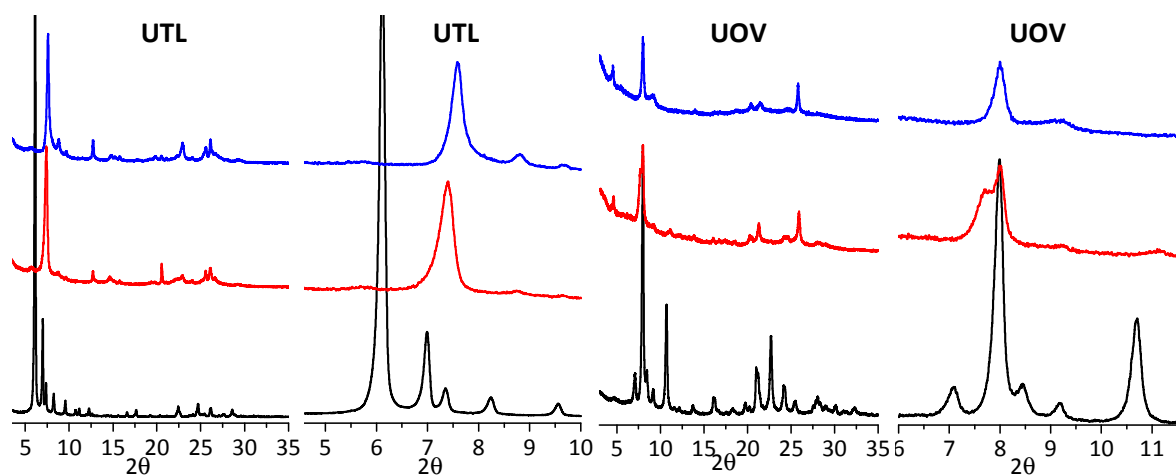

**Supplementary Figure 1. XRD patterns of the UTL- and UOV-derived zeolites.** The figure shows powder XRD patterns of **UTL** (Si/Ge = 2) and **UOV** (Si/Ge = 1.5) zeolites (black lines); samples subjected to VPT (red lines) and further calcination (blue lines). Two types of  $2\theta$  scales are used for clarity. Treatment of **UTL** leads to the formation of the IPC-7 material (change of first line position: red vs. blue patterns). Transformation of UOV results in the formation of the IPC-12 zeolite (black vs. red/blue patterns).

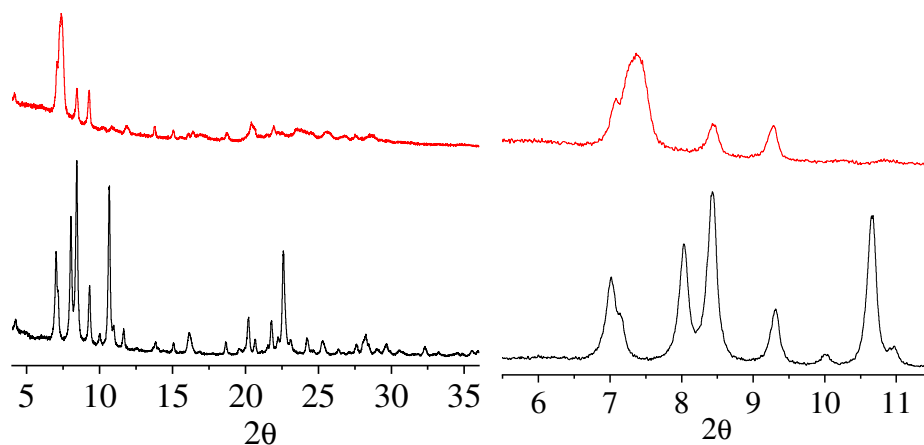

**Supplementary Figure 2. XRD of initial IWW and respective VPT intermediate.** XRD patterns of the initial **IWW** (black) and IPC-18P (red). Two types of  $2\theta$  scales are used for clarity. Layers of IWW zeolite (high  $2\theta$  region in XRD pattern) being unstable during conventional ADOR treatment, withstand VPT resulting in intermediate derivative (IPC-18P).

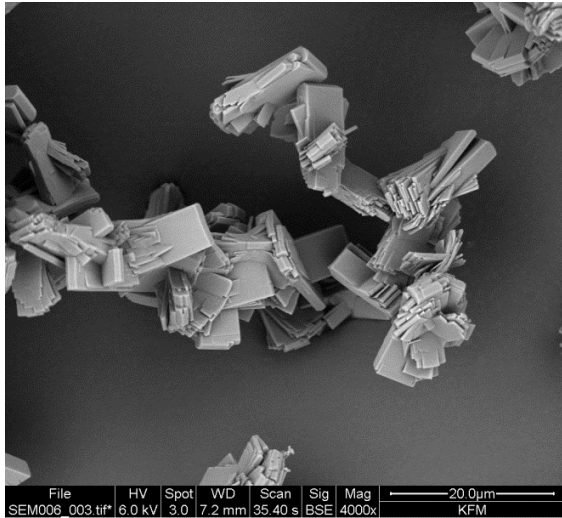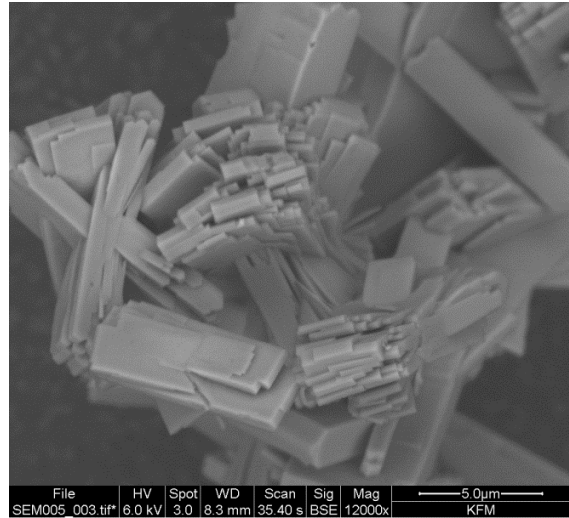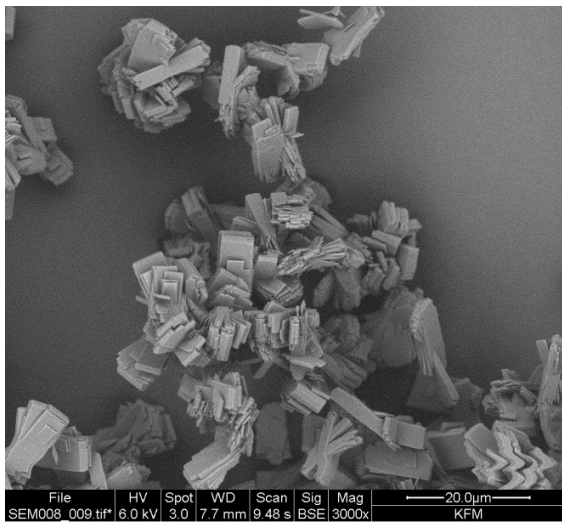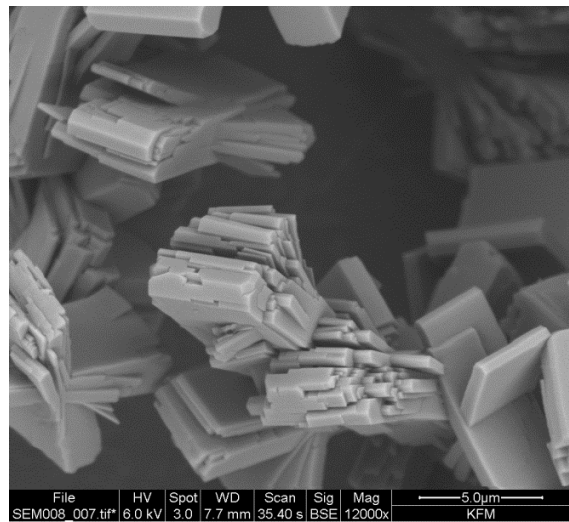

**Supplementary Figure 3. Comparison of the morphology of initial IWW and final IPC-18.** SEM images of the initial IWW (top) and IPC-18 (bottom). SEM images show similar shape and size of the crystals for both parent and daughter zeolites indicating no significant change of crystal morphology during VPT.

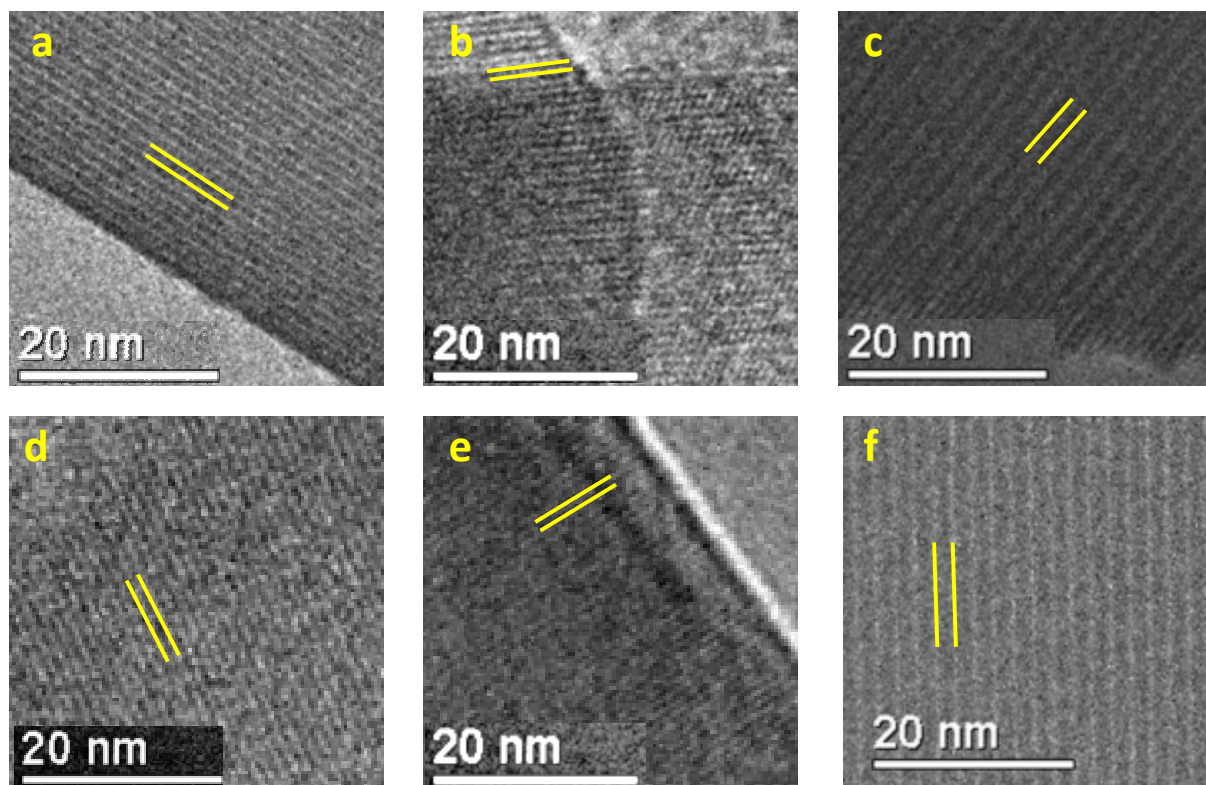

**Supplementary Figure 4. Comparison of the TEM images of IWW and IPC-18.** HRTEM images of initial **IWW** (a-c): d-spacings = 1.20 nm (001 projection, a), 0.95 nm (010, b), 2.02 nm (100, c); and final IPC-18 (d-f): d-spacing = 1.20 nm (001, d), d-spacing = 0.90 nm (010, e), d-spacing = 1.92 nm (100, f). Images collected in three projections confirm the major decrease of d-spacing along 100 projection and minor change along 010 direction, while d-spacing along 001 remains almost the same. This confirms anisotropic structural transformation of the structure of IWW during VPT.

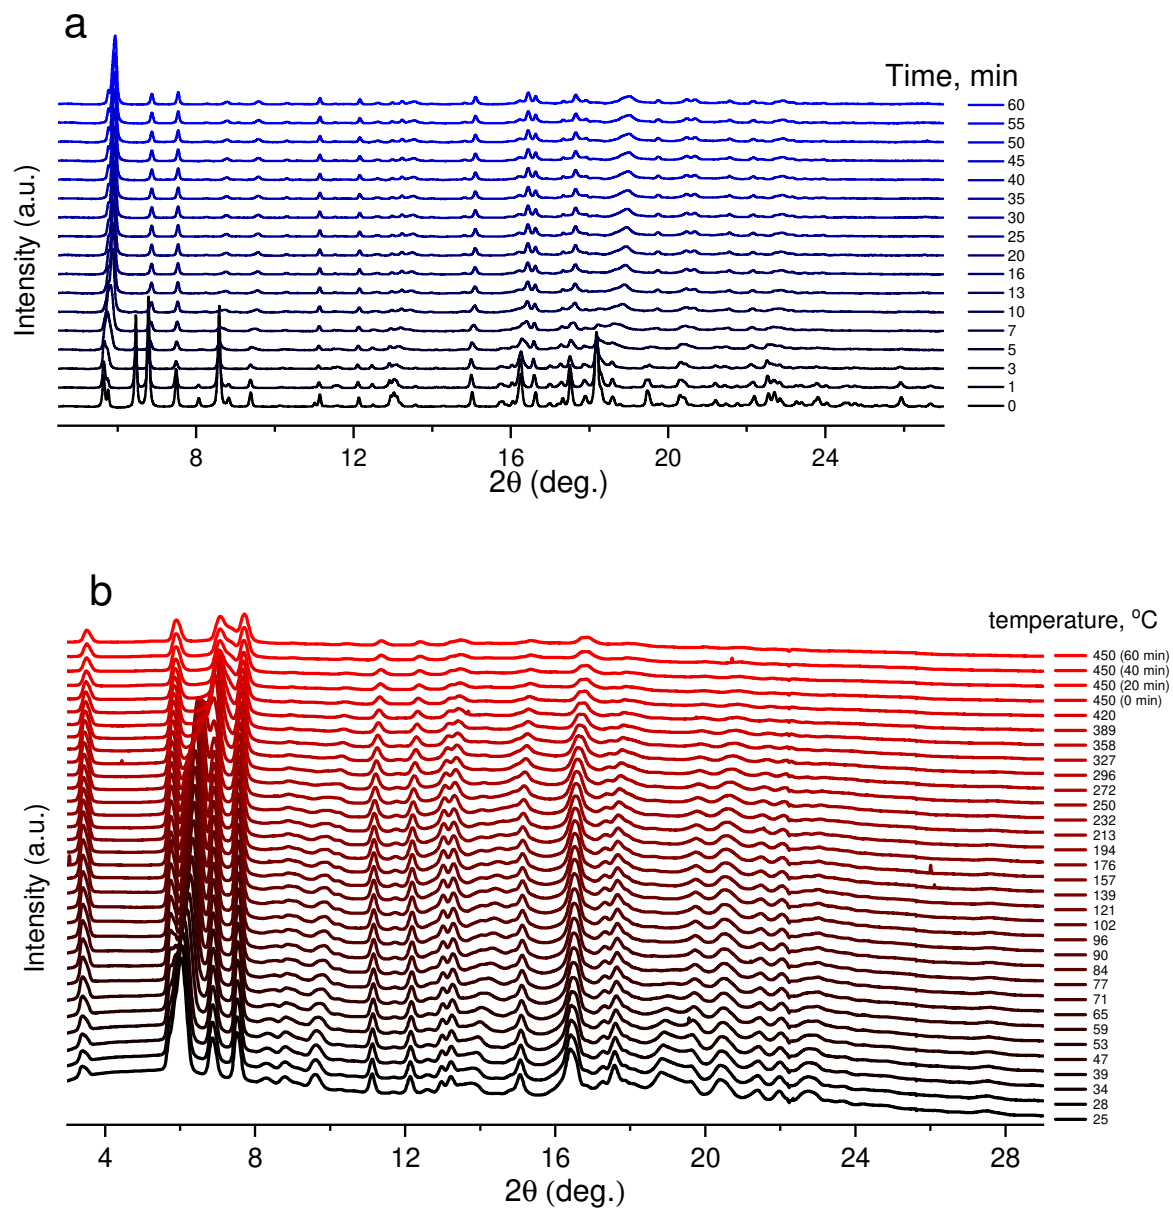

**Supplementary Figure 5. In situ XRD patterns for VPT (full  $2\theta$  range).** Full *in situ* XRD profiles for hydrolysis (a) and calcination (b). Selected areas of the patterns (Fig. 4) are analyzed and discussed in the main part.

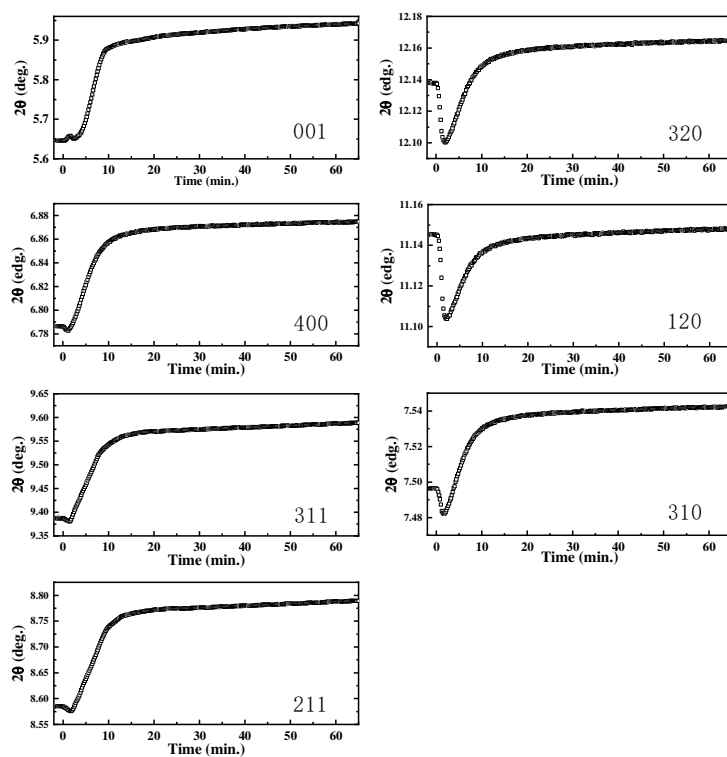

**Supplementary Figure 6.** Time-dependent peak position of (001), (320), (400), (120), (311), (310) and (211) reflections during the hydrolysis process. Selected parameters are plotted (Fig. 4) and discussed in the main part.

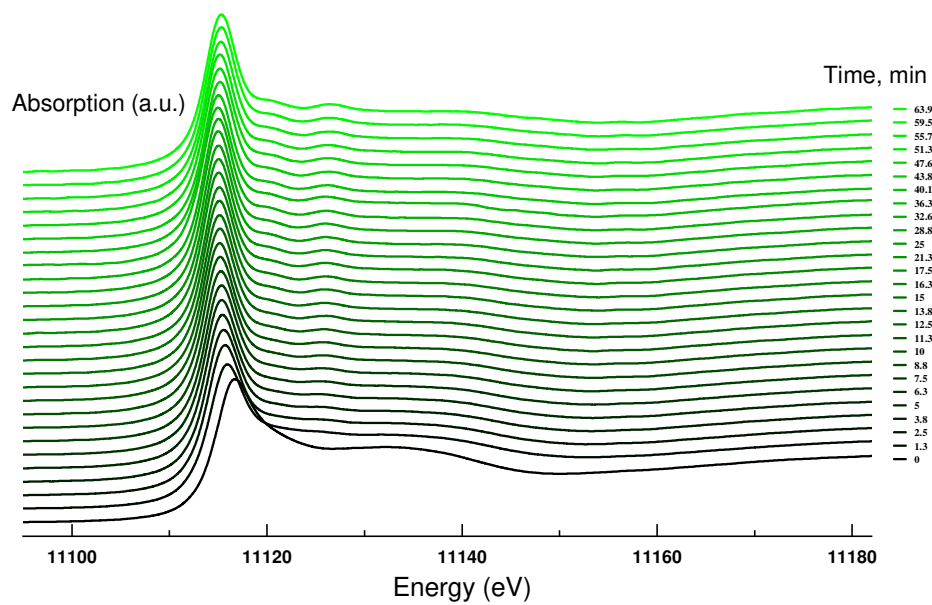

**Supplementary Figure 7.** Full *in situ* Ge XANES profiles. Patterns were used for quantitative analysis discussed in the main part (Fig. 4).
